# Supplementary material
Source: publisher figshare collection journal article supplement (https://acs.figshare.com/ndownloader/files/31081751)
Supplement: Supplementary file 1 [file 31081751]

## **Supporting Information**

### **High-throughput Detection of Multiple Contaminants Based on Portable Photo-electrochromic Sensor Chip**

Nan Hao<sup>a\*</sup>, Yanli Zuo<sup>a</sup>, Zhen Dai<sup>a</sup>, Meng Xiong<sup>b</sup>, Jie Wei<sup>a</sup>, Jing Qian<sup>a</sup>, Kun Wang<sup>a \*</sup>

*<sup>a</sup> School of Chemistry and Chemical Engineering, Jiangsu University, Zhenjiang 212013, PR  
China*

*<sup>b</sup> School of Biotechnology, Jiangsu University of Science and Technology, Zhenjiang 212018, PR  
China*

E-mail: [hn@ujs.edu.cn](mailto:hn@ujs.edu.cn); [wangkun@ujs.edu.cn](mailto:wangkun@ujs.edu.cn). Tel: +86 511 88791800.

## Content.

|                                                                               |   |
|-------------------------------------------------------------------------------|---|
| 1. Materials and Apparatus .....                                              | 3 |
| <b>1.1 Experimental materials</b> .....                                       | 3 |
| <b>1.2 Apparatus</b> .....                                                    | 3 |
| 2 Experimental section.....                                                   | 4 |
| <b>2.1 Synthesis of 3D-g-C<sub>3</sub>N<sub>4</sub></b> .....                 | 4 |
| <b>2.2 Synthesis of TiO<sub>2</sub>/3D-g-C<sub>3</sub>N<sub>4</sub></b> ..... | 4 |
| <b>2.3 The detection process of actual sample</b> .....                       | 5 |
| 3. Results and discussion .....                                               | 6 |
| <b>3.1 Characterization of materials</b> .....                                | 6 |
| <b>3.2 Sensor stability and actual sample detection performance</b> .....     | 7 |
| <b>3.3 Comparison of detection methods</b> .....                              | 8 |
| References .....                                                              | 8 |

## 1. Materials and Apparatus

### 1.1 Experimental materials

Melamine ( $C_3H_6N_6$ , AR,  $\geq 99.0\%$ ), Cyanuric acid ( $C_3H_3N_3O_3$ , AR, 99.0%), Isopropanol ( $C_3H_8O$ , AR), Glutaraldehyde (GA, AR), Bovine Serum Albumin (BSA, AR), Sodium Dihydrogen Phosphate ( $NaH_2PO_4$ , AR), Dibasic Sodium Phosphate ( $Na_2HPO_4$ , AR) and Chitosan (CS, AR, 99.0%) were purchased from Sinopharm Chemical Reagent Co., Ltd. (China), Titanium oxide, anatase ( $TiO_2$ , 99.8% metals basis, 25nm) purchased from Sinopharm Chemical Reagent Co., Ltd. (China). All of other chemicals are analytical grade, the ultrapure water was used throughout the experiment.

Ochratoxin A aptamer sequence: 5'-GAT CGG GTG TGG GTG GCG TAA AGG GAG CAT CGG ACA-3'

Lincomycin aptamer sequence: 5'-CGC GTG ATG TGG TCG ATG CGA TAC GGT GAG TCG CGC CAC GGC TAC ACA CGT CTC AGC GA-3'

Edifenphos aptamer sequence: 5'-C6-CGT ACG-GAA TTC GCT AGC TAA GGG ATT CCT GTA GAA GGA GCA GTC TGG ATC CGA GCT CCG-3'

All of aptamer was obtained from Sangon Biotech Co., Ltd (Shanghai, China).

### 1.2 Apparatus

The morphology and structure of samples image was obtained by a field emission scanning electron microscope (SEM, JSM-7800F, Japan). A D8 X-ray diffractometer equipped with (Bruker, Germany) high-intensity  $CuK\ \alpha$  ( $\lambda = 1.5406$ ) radiation was

used to record the X-ray diffraction (XRD) pattern. The electrochemical and photoelectrochemical (PEC) measurements were performed using a CHI 660E electrochemical workstation (Chen Hua Instruments Co., Shanghai, China) and a LED lamp (PL-LED100F, Beijing Precise Technology Co., Ltd.) in 0.1M phosphate buffer solution (PBS) at 0V. The laser etching is performed by Rui Zhiyi laser marking machine (rzy-bx-20b).

## **2 Experimental section**

### **2.1 Synthesis of 3D-g-C<sub>3</sub>N<sub>4</sub>**

To prepare 3D-g-C<sub>3</sub>N<sub>4</sub> material, 1.3 g of melamine and 1.3 g of cyanuric acid were added into 100 mL of ultrapure water and stirred at room temperature for 12 h. The precursors were then centrifuged at 8000 rpm for 5 min, followed by filtering and drying in an oven at 75°C for 12 h. The dried precursors were finally ground and placed in a crucible and calcined in a muffle furnace at 430°C for 4 h. The final color of 3D-g-C<sub>3</sub>N<sub>4</sub> material was yellow. The dried precursors were finally milled and placed in a crucible and calcined in a muffle furnace at 430°C for 4 h to obtain 3D-g-C<sub>3</sub>N<sub>4</sub> material with a yellow color.

### **2.2 Synthesis of TiO<sub>2</sub>/3D-g-C<sub>3</sub>N<sub>4</sub>**

Preparation of TiO<sub>2</sub>/3D-g-C<sub>3</sub>N<sub>4</sub> composites was according previous works.<sup>1</sup> 1.3 g of melamine, 1.3 g of cyanuric acid and 0.4 g of titanium dioxide were added into 100 mL of ultrapure water and stirred at room temperature for 12 h for the self-assemble of TiO<sub>2</sub>/g-C<sub>3</sub>N<sub>4</sub> precursor by triple hydrogen bonding between melamine and cyanuric

acid. The precursors were then centrifuged at 8000 rpm for 5 min, followed by filtering and drying in an oven at 75°C for 12 h. Finally, the dried precursors were milled and placed in a crucible and calcined in a muffle furnace at 430°C for 4 h. TiO<sub>2</sub>/3D-g-C<sub>3</sub>N<sub>4</sub> composites with a light-yellow color were obtained.

To prepare g-C<sub>3</sub>N<sub>4</sub> material,<sup>2</sup> 2 g of melamine was placed in a tube furnace and calcined at a rate of about 3°C/min to 550°C for 4 h to obtain g-C<sub>3</sub>N<sub>4</sub>. g-C<sub>3</sub>N<sub>4</sub> was ground into ultra-fine powder and this calcination process was repeated until obtaining bright yellow powder. After that, 2 mg of g-C<sub>3</sub>N<sub>4</sub> was dispersed in 1 mL of isopropanol and sonicated for 2 h to obtain the suspension.

### **2.3 The detection process of actual sample**

The preprocessing of the actual sample solution are as follows. 5 g of homogenized fish liver was placed into a 50 mL centrifuge tube. 10 mL methanol solution (80%) was added and fully shook evenly. Then this solution was centrifuged at 1800 rpm for 5 min, and the supernatant was taken into a new centrifuge tube. Next, the obtained supernatant was centrifuged twice for 10 min at 4000 rpm. Then, the supernatant was further filtered by organic microporous filter membrane. Afterwards, three standard solutions of high concentrations are added to the filtered solution and diluted to prepare three actual sample solutions. 20 µL of the obtained actual sample solution was dropped onto the aptamer-modified chip and incubated at 37°C for 45 min. After rinsed with ultrapure water, the chip was placed in PBS solution and illuminated by LED light for 15 minutes.

3. Results and discussion

3.1 Characterization of materials

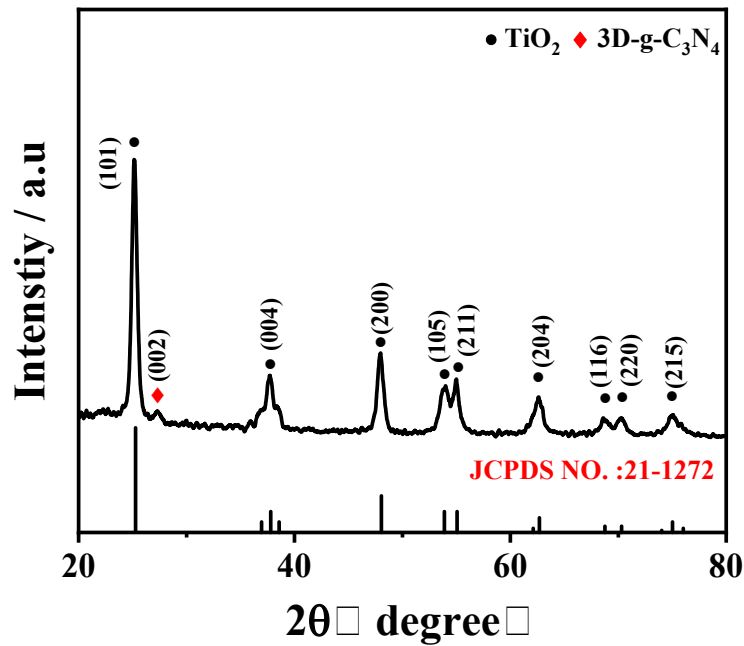

Figure S1. The XRD of the prepared TiO<sub>2</sub>/3D-g-C<sub>3</sub>N<sub>4</sub> composite.

3.2 Sensor stability and actual sample detection performance

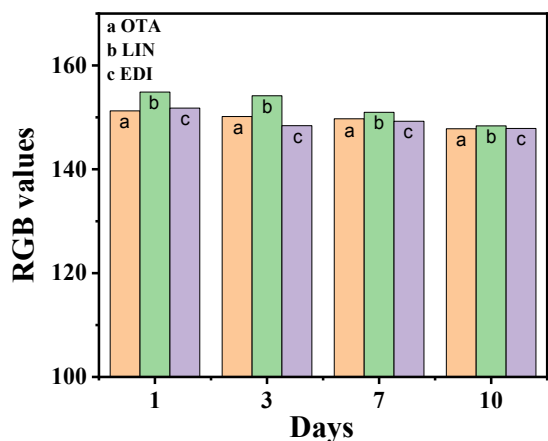

Figure S2. The stability measurement of the sensor chips after storage.

Table S1. Recovery tests of OTA, Lin and EDI in 10-fold diluted freshwater fish liver extract (n=3).

| Spiked sample | Added (ng/mL)      | Found (ng/mL)         | Recovery (%) | RSD (%) |
|---------------|--------------------|-----------------------|--------------|---------|
| OTA 1         | 1                  | 1.01                  | 101          | 2.83    |
| OTA 2         | 10                 | 10.3                  | 103          | 2.21    |
| OTA 3         | 30                 | 31.7                  | 105          | 3.07    |
| Spiked sample | Added (mol/mL)     | Found (mol/mL)        | Recovery (%) | RSD (%) |
| LIN 1         | $1 \times 10^{-8}$ | $9.55 \times 10^{-8}$ | 95.5         | 2.96    |
| LIN 2         | $1 \times 10^{-7}$ | $9.24 \times 10^{-8}$ | 92.4         | 2.24    |
| LIN 3         | $2 \times 10^{-7}$ | $1.85 \times 10^{-7}$ | 92.5         | 3.61    |
| Spiked sample | Added (ng/mL)      | Found (ng/mL)         | Recovery (%) | RSD (%) |
| EDI 1         | 1                  | 1.04                  | 104          | 3.96    |
| EDI 2         | 10                 | 10.8                  | 108          | 2.17    |
| EDI 3         | 50                 | 48.7                  | 97.4         | 2.53    |

### 3.3 Comparison of detection methods

**Table S2. Comparison with other detection methods.**

| Method                                                                         | Liner range                                                | Detection limit                                        | Refs      |
|--------------------------------------------------------------------------------|------------------------------------------------------------|--------------------------------------------------------|-----------|
| PEC aptasensor with triple signal amplification (OTA detection)                | 0.0005~0.5 ng /mL                                          | 0.00021 ng /mL                                         | 3         |
| aptamer–photonic crystal encoded suspension array (OTA detection)              | 0.01~1 ng / mL                                             | 0.25 pg / mL                                           | 4         |
| chemiluminescence reaction system (LIN detection)                              | $1.8 \times 10^{-8} \sim 2.2 \times 10^{-5}$ mol/L         | $5.6 \times 10^{-9}$ mol/L                             | 5         |
| liquid chromatography methods with charged aerosol detection (LIN detection)   | $2.7 \times 10^{-7} \sim 1.0 \times 10^{-3}$ mol/L         | $8 \times 10^{-8}$ mol/L                               | 6         |
| Colorimetric method (EDI detection)                                            | $1.5 \times 10^3 \sim 7.7 \times 10^3$ ng/L                | $1.5 \times 10^3$ ng/L                                 | 7         |
| Fluorescence spectroscopy (EDI detection)                                      | $0.5 \times 10^3 \sim 6 \times 10^3$ ng/L                  | $0.13 \times 10^3$ ng/L                                | 8         |
| Photochromic visualization sensor (Simultaneous detection of OTA, LIN and EDI) | 1~100 ng/mL<br>$10^{-11} \sim 10^{-4}$ mol/L<br>1~100 ng/L | 0.33 ng/mL<br>$3.3 \times 10^{-12}$ mol/L<br>0.33 ng/L | This work |

### References

- Sheng, Y. Q.; Wei, Z.; Miao, H.; Yao, W. Q.; Li, H. Q.; Zhu, Y. F., Enhanced organic pollutant photodegradation via adsorption/photocatalysis synergy using a 3D g-C<sub>3</sub>N<sub>4</sub>/TiO<sub>2</sub> free-separation photocatalyst. *Chem. Eng. J.* **2019**, *370*, 287-294.
- Yan, S. C.; Li, Z. S.; Zou, Z. G., Photodegradation performance of g-C<sub>3</sub>N<sub>4</sub> fabricated by directly heating melamine. *Langmuir* **2009**, *25* (17), 10397-401.
- Tang, J.; Xiong, P.; Li, J.; Cheng, Y.; Tian, X.; Chen, Y.; Sun, Y.; Tang, D.,



Target-induced elimination of photosensitizer and formation insulation layer enabling ultrasensitive photoelectrochemical detection of ochratoxin A. *Sens. Actuators, B* **2019**, 297, 126707.

4. Yue, S.; Jie, X.; Wei, L.; Bin, C.; Dou Dou, W.; Yi, Y.; QingXia, L.; JianLin, L.; TieSong, Z., Simultaneous Detection of Ochratoxin A and Fumonisin B1 in Cereal Samples Using an Aptamer–Photonic Crystal Encoded Suspension Array. *Anal. Chem.* **2014**, 86 (23), 11797-11802.

5. Yang, C.; Zhang, Z.; Shi, Z. J. M. A., A novel chemiluminescence reaction system for the determination of lincomycin with diperiodatonickelate (IV). *Microchim. Acta* **2010**, 168 (3-4), 293-298.

6. Stypulkowska, K.; Blazewicz, A.; Brudzikowska, A.; Warowna–Grzeskiewicz, M.; Sarna, K.; Fijalek, Z. J. J. o. p.; analysis, b., Development of high performance liquid chromatography methods with charged aerosol detection for the determination of lincomycin, spectinomycin and its impurities in pharmaceutical products. *J. Pharm. Biomed. Anal.* **2015**, 112, 8-14.

7. Kwon, Y. S.; Nguyen, V.-T.; Park, J. G.; Gu, M. B. J. A. c. a., Detection of iprobenfos and edifenphos using a new multi-aptasensor. *Anal. Chim. Acta* **2015**, 868, 60-66.

8. Arvand, M.; Mirroshandel, A. A., Highly-sensitive aptasensor based on fluorescence resonance energy transfer between l-cysteine capped ZnS quantum dots and graphene oxide sheets for the determination of edifenphos fungicide. *Biosens. Bioelectron.* **2017**, 96, 324-331.
